# Supplementary material for: Knowledge and practice of health workers about control and prevention of multidrug-resistant tuberculosis in referral hospitals, Ethiopia: a cross-sectional study
Source: PubMed Central journal article supplement — BMJ Open. 2019 Feb 3;9(2):e022948. doi: 10.1136/bmjopen-2018-022948 (PMC6368005; doi:10.1136/bmjopen-2018-022948), 2019-02-03
Supplement: bmjopen-2018-022948.draft_revisions.pdf [file bmjopen-2018-022948.draft_revisions.pdf]

# BMJ Open

BMJ Open is committed to open peer review. As part of this commitment we make the peer review history of every article we publish publicly available.

When an article is published we post the peer reviewers' comments and the authors' responses online. We also post the versions of the paper that were used during peer review. These are the versions that the peer review comments apply to.

The versions of the paper that follow are the versions that were submitted during the peer review process. They are not the versions of record or the final published versions. They should not be cited or distributed as the published version of this manuscript.

BMJ Open is an open access journal and the full, final, typeset and author-corrected version of record of the manuscript is available on our site with no access controls, subscription charges or pay-per-view fees (<http://bmjopen.bmj.com>).

If you have any questions on BMJ Open's open peer review process please email [info.bmjopen@bmj.com](mailto:info.bmjopen@bmj.com)

# BMJ Open

## Knowledge and practice of health workers about control and prevention of multidrug-resistant tuberculosis in referral hospitals, Ethiopia

|                               |                                                                                                                                                                                                                                                                                                                                                                                                                                                                                                                          |
|-------------------------------|--------------------------------------------------------------------------------------------------------------------------------------------------------------------------------------------------------------------------------------------------------------------------------------------------------------------------------------------------------------------------------------------------------------------------------------------------------------------------------------------------------------------------|
| Journal:                      | <i>BMJ Open</i>                                                                                                                                                                                                                                                                                                                                                                                                                                                                                                          |
| Manuscript ID                 | bmjopen-2018-022948                                                                                                                                                                                                                                                                                                                                                                                                                                                                                                      |
| Article Type:                 | Research                                                                                                                                                                                                                                                                                                                                                                                                                                                                                                                 |
| Date Submitted by the Author: | 16-Mar-2018                                                                                                                                                                                                                                                                                                                                                                                                                                                                                                              |
| Complete List of Authors:     | Alene, Keyfalew Addis; University of Gondar College of Medicine and Health Sciences; University of Gondar, Institute of Public Health<br>Yifiru, Sisay ; University of Gondar College of Medicine and Health Sciences, School of Medicine<br>Adane, Akilew; University of Gondar<br>Bitew, Bikes ; University of Gondar College of Medicine and Health Sciences, Institute of Public Health<br>Adane, Aynishet; University of Gondar College of Medicine and Health Sciences<br>Koye, Digsu Negese; University of Gondar |
| Keywords:                     | Tuberculosis < INFECTIOUS DISEASES, Public health < INFECTIOUS DISEASES, Health & safety < HEALTH SERVICES ADMINISTRATION & MANAGEMENT, Epidemiology < INFECTIOUS DISEASES, Infection control < INFECTIOUS DISEASES                                                                                                                                                                                                                                                                                                      |
|                               |                                                                                                                                                                                                                                                                                                                                                                                                                                                                                                                          |

SCHOLARONE™  
Manuscripts

Only

## Knowledge and practice of health workers about control and prevention of multidrug-resistant tuberculosis in referral hospitals, Ethiopia

Kefyalew Addis Alene\*<sup>1</sup>, Akilew Awoke Adane<sup>1</sup>, Sisay Yifiru<sup>2</sup>, Bikes Destaw Bitew<sup>1</sup>, Aynishet Adane<sup>2</sup>, Digsu Negese Koye<sup>1</sup>

<sup>1</sup>Institute of Public Health, College of Medicine and Health Sciences, University of Gondar, Gondar, Ethiopia.

<sup>2</sup>School of Medicine, College of Medicine and Health Sciences, University of Gondar, Gondar, Ethiopia.

E-mail address:

KAA: [kefyalew.alene@anu.edu.au](mailto:kefyalew.alene@anu.edu.au)

AAA: [akilew24@gmail.com](mailto:akilew24@gmail.com)

SY: [sisaydr@yahoo.com](mailto:sisaydr@yahoo.com)

BD: [destaw2004@gmail.com](mailto:destaw2004@gmail.com)

AA: [ayne.2003@gmail.com](mailto:ayne.2003@gmail.com)

DNK: [digsuneg@gmail.com](mailto:digsuneg@gmail.com)

**\*Correspondence:** Kefyalew Addis Alene, Institute of Public Health, College of Medicine and Health Sciences, University of Gondar, 196 Gondar, Gondar, Ethiopia. E-mail: [kefyalew.alene@anu.edu.au](mailto:kefyalew.alene@anu.edu.au); Tel: +61404705064

## Abstract

**Objective:** The emergence of multidrug-resistance tuberculosis (MDR-TB) has become a major public health problem in a number of countries and an obstacle to the global and national TB control efforts. Health workers have key roles in the prevention and control of MDR-TB. The aim of this study was to assess the knowledge and practice of health workers towards MDR-TB in Amhara region referral hospitals, Ethiopia.

**Design:** A cross-sectional study.

**Settings:** Two large referral hospitals in Amhara region, Ethiopia.

**Participants:** Randomly selected health workers.

**Outcomes:** Participants' knowledge and practice on MDR-TB prevention and control were assessed using self-administered and structured questionnaire.

**Results:** A total of 377 health workers (with a response rate of 93.7%) were participated; majority of them were nurses 198 (52.5%) and medical doctors 59(15.6%). Overall, 149 (39.5%) of health workers rated their knowledge of MDR-TB as inadequate. Holding postgraduate degree (AOR=5.78; 95% CI: 2.33, 14.33), getting training on infection prevention (AOR= 1.79; 95% CI: 1.00, 3.17) and had past history of TB infection (AOR= 1.85; 95% CI: 1.12, 3.03) were significantly associated with health workers' knowledge on MDR-TB. Only, one fifth (19.6%) of health workers have good practice towards the prevention and control of MDR-TB. Working in Internal Medicine (AOR= 4.64; 95% CI: 1.99, 10.81) and Pediatrics (AOR=3.85; 95% CI: 1.11, 13.34) words, being in the age groups of 26-30 years (AOR= 2.70; 95% CI: 1.27, 5.76), and 30 years and above (AOR=4.42; 95% CI: 1.77, 11.00) were significantly associated with good practices of health workers.

**Conclusions:** Health workers in Amhara region referral hospitals lack adequate knowledge and good practice towards the prevention and control of MDR-TB. Making available MDR-TB guidelines to all health workers and providing training especially for diploma holder is needed to enhance health workers' knowledge and practice.

## Strengths and limitations of this study

- The study was conducted in two large referral hospitals
- Data were collected among different health workers such as medical doctor, nurses, health officer, pharmacy, medical laboratory and midwifery.
- A potential limitation of this study is that the proportion of practice may be overestimated, due to social desirability bias, as we did not observe study participants for their practice.

For peer review only

## Introduction

Multidrug-resistant tuberculosis (MDR-TB) is defined as TB that is resistant to at least isoniazid and rifampin, the two most effective first-line, anti-TB drugs<sup>1</sup>. The emergence of MDR-TB is a major public health problem and is an obstacle for national and global TB control programs<sup>2</sup>. Globally, nearly half a million people are estimated to have MDR-TB annually, and only one fourth of them get adequate treatment<sup>3-5</sup>. In 2016, there were an estimated 490 000 new cases of MDR-TB, and approximately 240 000 deaths from MDR-TB<sup>6,7</sup>. Treatment for MDR-TB has substantially longer duration, higher costs and more toxicity than the treatment for drug-susceptible TB<sup>8</sup>.

MDR-TB occurs in patients either due to the development of drug resistance during a course of first-line TB treatment (i.e. acquired MDR-TB)<sup>9</sup>, or due to the transmission of a drug resistant strain from an infectious patient to a susceptible host (i.e. primary MDR-TB)<sup>10</sup>. Acquired MDR-TB occurs as a result of sub-optimal first line TB treatment related to health care providers or patient factors<sup>11,12</sup>. There is increasing evidence that primary MDR-TB is common and that many patients with MDR-TB had it from the start of treatment<sup>13-15</sup>. Inadequate knowledge and poor practice of health professional towards the prevention and control of MDR-TB may exacerbate the transmission of MDR-TB in health care settings<sup>16</sup>. Health workers have potential to contact with MDR-TB patients, and are very important stakeholders in health care settings to combat MDR-TB; however their knowledge and practices towards the prevention and control of MDR-TB has not been well studied, especially in high TB burden countries.

In Ethiopia - a high burden TB and MDR-TB country - the incidence of TB has decreased over time following the implementation of a range of interventions, including the delivery of TB care by health workers and directly observed therapy (DOT)<sup>17,18</sup>. However, the number of MDR-TB cases has increased over time and has become a challenge for the national TB control and prevention program<sup>18,19</sup>. Assessing the knowledge and practice of health workers on MDR-TB, and identifying factors associated with inadequate knowledge and low practice are important for the prevention and control of MDR-TB. Therefore, the aim of this study was to assess the knowledge and practice of health workers related to MDR-TB, and to identify factors associated with inadequate knowledge and low practice of health workers toward the prevention and control of MDR-TB in Amhara region referral hospitals, Ethiopia.

## Methods

**Study design and setting:** A cross-sectional study was conducted in Amhara regional referral hospitals from January to May, 2014. Amhara region has 19 Governmental hospitals, 801 governmental health centers, 3302 health post, 861 private clinic, 8 private hospitals, 40 charity clinics and 65 diagnostic laboratory facilities. Five of the hospitals are referral from which Gondar University Hospital has MDR-TB center; its MDR-TB service was initiated in 2010 and currently it has around 80 MDR-TB patients. During the study period, Amhara Region Referral Hospitals have 304 Medical Doctors, 3790 nurses, 434 Public Health Officers and 287 Midwifery. The TB detection rate in the region is 34%.

**Study population:** The study population was consisted of a sample of health workers who were working in the two large Amhara regional referral hospitals, Gondar University Referral Hospital and Felege Hiwot Refereal Hospital. Those health workers who were temporarily employed in these hospitals were excluded from the study.

**Sampling procedures:** Sample size was calculated using single population proposition formula  $[n = [(z\alpha/2)^2 * P(1-P)]/d^2]$  by assuming 95% confidence level of  $Z \alpha/2 = 1.96$ , margin of error 5%, 50% proportion to have maximum sample size, and by adding 5% non-response rate a total of 402 health workers were considered. The sample size was proportionally allocated to the two referral hospitals based on their number of health professional. Medical doctor, Nurses, Health Officer, Pharmacy, Medical Laboratory and Midwifery were included in the study.

**Data collection:** Data were collected by pre-tested, structured, self-administered questionnaire. The questionnaire was available to participants with the help of data collectors. The completed questionnaires were turned back after checking its completeness. The questionnaire used for the data collection was developed by a team of health workers. The questions that used to assess the knowledge and practice of health workers were developed based on the national and WHO MDR-TB management guidelines<sup>8 20</sup>.

Level of knowledge was assessed out of 10 questions. The questions were about MDR-TB definition, etiology, diagnosis, symptoms, treatment and prevention. The knowledge level was

1 categorized as good knowledge for those who score mean and above the mean; and poor knowledge  
2 for those who score less than the mean. Practice of health workers about MDR-TB prevention and  
3 control were assessed by using the following questions: do you have access to MDR-TB guideline?,  
4 how frequently are you referring the MDR-TB guideline?, does cross ventilation implemented in  
5 your working room?, have you ever participating in educating patient about MDR-TB?, does the  
6 hospital provided you Masks N95?, and frequency of using Masks N95 while attending the patients.  
7  
8  
9  
10  
11

12 **Data processing and analysis:** The returned questionnaires were checked for completeness,  
13 cleaned manually and analyzed using SPSS windows version 20.0. Frequencies and cross tabulations  
14 were used to summarize descriptive statistics, tables and graphs were used for data presentation.  
15 Both bivariate and multivariable logistic regression models were used to identify variables which  
16 have an association with the dependent variables (i.e. knowledge and practice). Variables found to  
17 have p-value up to 0.2 in the bivariate analysis, entered in to multivariate logistic regressions for  
18 controlling the possible effect of confounders and finally the variables which have significant  
19 association were identified on the basis of OR, with 95%CI.  
20  
21  
22  
23  
24  
25  
26

## 27 **Results**

### 28 **Socio-demographic characteristics**

29  
30 A total of 377 health workers (with a response rate of 93.7%) were participated in the study. About  
31 two-thirds of them were males 60.7% and BSc degree 62.6% holders, and about half of them were  
32 nurses 52.5 %. The mean age of the study participants was 27.6 ( $\pm 4.7$  SD) years.  
33  
34  
35  
36  
37  
38

39 More than one third 37.1% were working at outpatient department (OPD) and ever diagnosed for TB  
40 36.6%. Almost 90% and 80% of the health workers were not trained for TB/MDR-TB and infection  
41 prevention control, respectively. The mean number of years of working experience of the health  
42 workers was 6.5 years (Table 1).  
43  
44  
45  
46

### 47 **Knowledge of health workers on MDR-TB**

48  
49 Only two-fifth (39.5%) (95% CI: 35.0%, 44.3%) of the study participants were knowledgeable on  
50 MDR-TB. Main knowledge gaps observed in the health workers are defining MDR-TB (30%),  
51 identifying MDR-TB symptoms (41.4%) and selecting the nationally recommended MDR-TB  
52  
53  
54  
55



1 treatment (44.6%). Other gaps were noted that 44.6% and 55.6% were unable to identify the correct  
2 duration of MDR-TB treatment and the nationally recommended MDR-TB treatment regimens,  
3 respectively [Table 1].  
4  
5  
6

7 The multivariable analysis showed that educational level had an effect on knowledge of health  
8 professional on MDR-TB in which postgraduate degree holders [AOR 5.78 (95% CI: 2.33, 14.33)]  
9 had good knowledge towards MDR-TB as compared to diploma holders. Those health workers who  
10 had got training on infection prevention have also good knowledge on MDR-TB [AOR 1.79(95%  
11 CI: 1.00, 3.17)] as compared to those health workers who had not got training on infection  
12 prevention. Similarly, those health workers who had been diagnosed for TB (AOR 1.85 (95% CI:  
13 1.12, 3.03)) had good knowledge on MDR-TB as compared to their counterpart [Table 2].  
14  
15  
16  
17  
18  
19  
20

### 21 **Practice of health workers towards the prevention and control of MDR-TB**

22  
23 Less than one fourth of 19.6% (95% CI: 16.2, 23.8%) health workers had good practice towards the  
24 prevention and control of MDR-TB. One third (32.6%) of participants reported that they had access  
25 to MDR-TB guideline; and about 110 (29.17%) stated that they referred to these guidelines. About  
26 163 (43.2%) of participants reported that they implemented cross-ventilation in their working room.  
27 About 103 (27.3%) of the participants stated that they received protective masks from the hospital  
28 while attending to patients.  
29  
30  
31  
32  
33  
34

35 The practices of health workers for the prevention and control of MDR-TB were significantly and  
36 independently associated with ages of the respondents, working site in the hospital, and types of  
37 health professions. Those health workers who were working in internal medicine [AOR=4.64 (95%  
38 CI: 1.99, 10.81) and pediatrics [AOR=3.85 (95% CI: 1.11, 13.34)] were more likely to  
39 practice the prevention of MDR-TB than those health workers who were working at OPD,  
40 respectively.  
41  
42  
43  
44  
45

46 A relatively elder health workers who were in the age group of 26-30 years [AOR= 2.70 (95%CI:  
47 1.27, 5.76)] and >30 years [AOR=4.42 (95% CI: 1.77, 11.08)] were more likely to practice MDR-  
48 TB prevention than younger age groups (<25 years). Similarly, nurses were more likely to practice  
49 the prevention of MDR-TB as compared to medical doctors [AOR= 4.49 (95% CI: 1.03, 19.47)]  
50 [Table 3].  
51  
52  
53  
54  
55

## Discussion

Health workers have a key role in the prevention and control of MDR-TB, especially in resource-limited settings such as Ethiopia. However, in our study, only 39.5% of health workers had good knowledge about MDR-TB. Knowledge gaps were identified with regard to the definition of MDR-TB, the combination of nationally recommend drug and the duration of its treatment. Similar findings were reported from previous studies<sup>21 22</sup>. Health workers' knowledge about MDR-TB were associated with an increased level of education and taking of infection prevention training. Those health workers who have postgraduate and above had better knowledge about MDR-TB than diploma holders. This disparity was even more pronounced in those health professional who had been diagnosed for TB as they were more knowledgeable about MDR-TB. It clearly showed that there is further training need about MDR-TB for all diploma holder health workers.

It is found that only one forth (19.6%) of health works had good practice towards MDR-TB control and prevention. This low MDR-TB prevention and control practice among health workers is particularly risky in high TB burden countries such as Ethiopia because outbreaks of MDR-TB may occur in the hospitals. High rate of hospital transmission of MDR-TB has been reported in previous studies<sup>23 24</sup>.

With regard to the practice of referring to the treatment guidelines, it is only one third (32.6%) of participants had access to MDR-TB guideline in the hospitals; and less than on third (29.17%) of the participants referred to these guidelines while treating the patients. Although this finding is consistent with a report by other studies that a high number of healthcare practitioners fail to comply with clinical practice guidelines, this is noteworthy finding<sup>25 26</sup>. It is important that regional health bureau and hospital administration address this issue by making the MDR-TB guidelines available to all Health workers in the healthcare settings.

Although this study did not assess whether Health workers used protective mask appropriately through observation, slightly more than a quarter (27.3%) of the participants stated that they received protective masks from the hospital while attending to patients. This is also very low percentage, as all health workers should use protective masks when dealing with TB patients. This is especially important for medical doctors, health officers and nurses who have regular contact with the patients. However, in this study medical laboratory and other health workers had good practice than medical

1 doctors. This may indicate that medical doctors, their family members, their patients and all other  
2 persons they interact with will be at higher risk of infection with MDR-TB <sup>27 28</sup>.  
3  
4  
5

6 The limitation of this study is that the proportion of practice in this study may be overestimated, due  
7 to social desirability bias, as we did not observe study participants for their practice.  
8  
9

## 10 **Conclusions**

11 Health workers' level of knowledge about MDR-TB was not adequate in Amhara region, Ethiopia,  
12 and significantly associated with educational level, provision of training, history of TB diagnosis.  
13 The practice of health workers towards MDR-TB is also very low. Intensive training, enhance  
14 educational level, and making available the national MDR-TB guideline and protective mask in all  
15 health hospitals are strongly recommended.  
16  
17  
18  
19  
20  
21

22 **Acknowledgements:** We would like to acknowledge University of Gondar for providing fund to  
23 undertake this study. We gratefully thank all health workers and data collectors who participated in  
24 this study.  
25  
26

27 **Contributors:** KAA and AA: study design; KA and AAA: data collection; KAA: analysis and  
28 drafting of the manuscript; SY, AAA, BDB, AA and DNK study design and revision of the  
29 manuscript. All authors revised and approved the final version of the manuscript.  
30  
31

32 **Funding:** This study was funded by the University of Gondar.  
33

34 **Competing interests:** The authors declared that they have no competing interests.  
35  
36

37 **Patient consent:** Not required.  
38

39 **Ethics Approval:** Ethics approval was obtained from the Ethical Review Board of University of  
40 Gondar and permission letter was also obtained from the Hospital Administration Offices. Data were  
41 collected using self-administered questionnaire by providing information about the purpose of the  
42 study, and the rights of the study participant not to return the questionnaire, if they are not interesting  
43 about the questions, on the cover page of the questionnaire. Hence, the return of the questionnaire  
44 was considered as getting informed written consent from each study participant. In order to keep  
45 confidentiality of any information provided by study subjects, personal identifiers such as name and  
46 address were not collected.  
47  
48  
49

50 **Data sharing statement:** The data that support the findings of this study are available from the  
51 corresponding author on reasonable request.  
52  
53  
54  
55

## REFERENCE

1. WHO. Definitions and reporting framework for tuberculosis – 2013 revision (updated 2014) Geneva, Switzerland World Health Organization 2013.
2. WHO. *Global Tuberculosis Control SURVEILLANCE, PLANNING, FINANCING*. Switzerland: WHO Press, 2008.
3. Gandhi N. Extensively drug-resistant tuberculosis as a cause of death in patients co-infected with tuberculosis and HIV in a rural area of South Africa. *Lancet* 2006;**368**(9547):1575-80.
4. Shah N. Worldwide emergence of extensively drug-resistant tuberculosis *Emerging Infectious Diseases* 2007;**13**(3):380-87.
5. Migliori G. Extensively drug-resistant tuberculosis, Italy and Germany *Emerging Infectious Diseases* 2007;**13**(5):780-82.
6. WHO. Global tuberculosis report 2015. . 20th ed. Geneva, Switzerland: World Health Organization 2015.
7. WHO. Global tuberculosis report 2017. In: WHO, ed. Geneva: World Health Organization, 2017.
8. WHO. Companion handbook to the WHO guidelines for the programmatic management of drug-resistant tuberculosis. Geneva, Switzerland World Health Organization, 2014.
9. Caminero J. Multidrug-resistant tuberculosis: epidemiology, risk factors and case finding [State of the art series. Drug-resistant tuberculosis. Edited by CY. Chiang. Number 4 in the series]. *The International Journal of Tuberculosis and Lung Disease* 2010;**14**(4):382-90.
10. Dye C. Doomsday postponed? Preventing and reversing epidemics of drug-resistant tuberculosis. *Nature Reviews Microbiology* 2009;**7**(1):81-87.
11. Faustini A, Hall AJ, Perucci CA. Risk factors for multidrug resistant tuberculosis in Europe: a systematic review. *Thorax* 2006;**61**(2):158-63.
12. Han L, Sloutsky A, Canales R, et al. Acquisition of drug resistance in multidrug-resistant Mycobacterium tuberculosis during directly observed empiric retreatment with standardized regimens. *The International Journal of Tuberculosis and Lung Disease* 2005;**9**(7):818-21.
13. Dheda K, Limberis JD, Pietersen E, et al. Outcomes, infectiousness, and transmission dynamics of patients with extensively drug-resistant tuberculosis and home-discharged patients with programmatically incurable tuberculosis: a prospective cohort study. *The lancet Respiratory medicine* 2017.
14. Ragonnet R, Trauer JM, Denholm JT, et al. High rates of multidrug-resistant and rifampicin-resistant tuberculosis among re-treatment cases: where do they come from? *BMC Infectious Diseases* 2017;**17**(1):36.
15. Shah NS, Auld SC, Brust JC, et al. Transmission of Extensively Drug-Resistant Tuberculosis in South Africa. *New England Journal of Medicine* 2017;**376**(3):243-53.
16. Caminero JA. Multidrug-resistant tuberculosis: epidemiology, risk factors and case finding [State of the art series. Drug-resistant tuberculosis. Edited by C-Y. Chiang. Number 4 in the series]. *The International Journal of Tuberculosis and Lung Disease* 2010;**14**(4):382-90.
17. Economist. Tackling Tuberculosis in Ethiopia: a community-based approach. In: Unit TEI, ed., 2016.
18. MOH. Annual Tuberculosis Bulletin 2013. In: Health EFMO, ed. An extract of five years' TB, TB/HIV and Leprosy Control Program Analysis (EFY 2000 -2005). Addis Ababa: Health Promotion and Diseases Prevention Directorate, 2013.
19. Alene KA, Viney K, McBryde ES, et al. Treatment outcomes in patients with multidrug-resistant tuberculosis in north-west Ethiopia. *Tropical Medicine & International Health* 2017.
20. Biruck Kebede BA, Anteneh Kassa, Wubaye Walelgne, Andargachew Kumsa, Addisalem Yilma, Lelisa Fekadu, Birru Shigut, Kasech Sintayehu, Solomon Hassen, Etsegenet, Endale Mengesha, Abebaw Kebede. Guidelines on Programmatic Management of Drug Resistant Tuberculosis in Ethiopia. In: Health FDROEMO, ed. Addis Ababa, Ethiopia 2013.

- 1 21. Malangu N, Adebajo OD. Knowledge and practices about multidrug-resistant tuberculosis amongst  
2 healthcare workers in Maseru. *African journal of primary health care & family medicine* 2015;**7**(1):1-  
3 5.
- 4 22. Tefera G, Seid Y. Actual practice of healthcare providers towards prevention and control of Multidrug-  
5 resistant tuberculosis (MDR-TB) at Borumeda Hospital, Ethiopia. *African Journal of Pharmacy and*  
6 *Pharmacology* 2017;**11**(12):152-60.
- 7 23. Crudu V, Merker M, Lange C, et al. Nosocomial transmission of multidrug-resistant tuberculosis. *The*  
8 *International Journal of Tuberculosis and Lung Disease* 2015;**19**(12):1520-23.
- 9 24. Bantubani N, Kabera G, Connolly C, et al. High rates of potentially infectious tuberculosis and multidrug-  
10 resistant tuberculosis (MDR-TB) among hospital inpatients in KwaZulu Natal, South Africa indicate  
11 risk of nosocomial transmission. *PloS one* 2014;**9**(3):e90868.
- 12 25. Cabana MD RC, Powe NR, et al. Why don't physicians follow clinical practice guidelines? A framework for  
13 improvement. *JAMA* 1999;**282**(15):458-1465.
- 14 26. Holtz TH LJ, Laserson KF, et al. Risk factors associated with default from multidrug-resistant tuberculosis  
15 treatment. *Int J Tuberc Lung Dis* 2006;**10**(6):649-55.
- 16 27. Schaaf HS MA, Dheda K. Multidrug- and extensively drug-resistant tuberculosis in Africa and South  
17 America: Epidemiology, diagnosis and management in adults and children. *Clin Chest Med*  
18 2009;**30**(4):667–83.
- 19 28. Zhao M LX, Xu P, et al. . Transmission of MDR and XDR tuberculosis in Shanghai, China. *PLoS ONE* 2009;**4**(  
20 2):4370.
- 21
- 22
- 23
- 24
- 25
- 26
- 27
- 28
- 29
- 30
- 31
- 32
- 33
- 34
- 35
- 36
- 37
- 38
- 39
- 40
- 41
- 42
- 43
- 44
- 45
- 46
- 47
- 48
- 49
- 50
- 51
- 52
- 53
- 54
- 55
- 56
- 57
- 58
- 59
- 60

Table 1: Number and percent (%) of correct response among health profession towards all knowledge questions

| <b>Characteristics</b>                                        | <b>Number</b> | <b>Percent</b> |
|---------------------------------------------------------------|---------------|----------------|
| What is MDR-TB?                                               | 264           | 70.0           |
| MDR-TB is contagious?                                         | 345           | 91.5           |
| What is the cause of MDR-TB?                                  | 357           | 94.7           |
| All people with MDR-TB infection have symptoms                | 148           | 39.3           |
| What is the most common symptom of MDR-TB?                    | 221           | 58.6           |
| How MDR-TB is diagnosed?                                      | 368           | 97.6           |
| The definitive way of assessing MDR-TB treatment outcome      | 241           | 63.9           |
| The duration of treatment for MDR-TB is                       | 209           | 55.4           |
| MDR-TB can be treated with one the following drug combination | 168           | 44.6           |
| Putting on N95 can reduce the risk of transmission of MDR-TB  | 314           | 83.3           |

Table 2: Socio-demographic characteristics and factors associated with health workers' knowledge on MDR-TB at Gondar University Hospital and Felege Hiwot Hospitals, Northwest Ethiopia

| Variables                         | Number | Percent | MDR-TB Knowledge |      | 95% CI              |                    |
|-----------------------------------|--------|---------|------------------|------|---------------------|--------------------|
|                                   |        |         | Good             | Poor | COR                 | AOR                |
| <b>Working site</b>               |        |         |                  |      |                     |                    |
| Internal medicine                 | 79     | 21.0    | 37               | 40   | 1:00                |                    |
| Surgery                           | 46     | 12.2    | 17               | 29   | 0.60 (0.28, 1.26)   |                    |
| Gynecology and Obstetrics         | 43     | 11.4    | 17               | 26   | 0.67 (0.31, 1.42)   |                    |
| Pediatrics                        | 52     | 13.8    | 24               | 28   | 0.87 (0.43, 1.77)   |                    |
| OPD and Others                    | 157    | 41.6    | 52               | 105  | 0.50 (0.29, 0.88)   |                    |
| <b>Age (year)</b>                 |        |         |                  |      |                     |                    |
| <25                               | 130    | 34.5    | 50               | 80   | 1:00                |                    |
| 26-30                             | 189    | 50.1    | 80               | 109  | 1.17 (0.74, 1.85)   |                    |
| >30                               | 58     | 15.4    | 19               | 39   | 0.77 (0.40, 1.49)   |                    |
| <b>Sex</b>                        |        |         |                  |      |                     |                    |
| Male                              | 229    | 60.7    | 103              | 126  | 1.81 (1.17, 2.80)   |                    |
| Female                            | 148    | 39.3    | 46               | 102  | 1:00                |                    |
| <b>Marital status</b>             |        |         |                  |      |                     |                    |
| Married                           | 155    | 41.9    | 57               | 98   | 0.82 (0.53, 1.25)   |                    |
| Note married                      | 222    | 49.1    | 92               | 130  | 1:00                |                    |
| <b>Profession</b>                 |        |         |                  |      |                     |                    |
| MD                                | 59     | 15.6    | 42               | 17   | 1:00                |                    |
| Nurse                             | 198    | 52.5    | 70               | 128  | 0.22 (0.11, 0.41)   |                    |
| Medical laboratory                | 44     | 11.7    | 13               | 31   | 0.17 (0.07, 0.40)   |                    |
| Other health professional*        | 76     | 20.1    | 24               | 52   | 0.18 (0.08, 0.39)   |                    |
| <b>Educational level</b>          |        |         |                  |      |                     |                    |
| Diploma                           | 75     | 19.9    | 16               | 59   | 1:00                | 1:00               |
| BSc                               | 236    | 62.6    | 99               | 157  | 2.32 (1.26, 4.26)   | 1.58 (0.81, 3.05)  |
| Postgraduate above                | 66     | 17.5    | 34               | 12   | 10.44 (4.42, 24.67) | 5.78 (2.33, 14.33) |
| <b>Staff categories</b>           |        |         |                  |      |                     |                    |
| Teaching staff                    | 56     | 14.9    | 35               | 21   | 3.00 (1.68, 5.44)   |                    |
| Hospital staff                    | 321    | 85.1    | 114              | 207  | 1:00                |                    |
| <b>Working experience (years)</b> |        |         |                  |      |                     |                    |
| <3                                | 139    | 36.9    | 59               | 80   | 1.17 (0.73, 1.88)   |                    |
| 3-6                               | 90     | 23.9    | 33               | 57   | 0.92 (0.53, 1.58)   |                    |
| >6                                | 148    | 39.3    | 57               | 91   | 1:00                |                    |
| <b>Ever diagnosed for TB</b>      |        |         |                  |      |                     |                    |

|                                         |     |      |     |     |                   |                   |
|-----------------------------------------|-----|------|-----|-----|-------------------|-------------------|
| Yes                                     | 138 | 36.6 | 35  | 103 | 2.68 (1.69, 4.25) | 1.85 (1.12, 3.03) |
| No                                      | 239 | 63.4 | 114 | 125 | 1:00              | 1:00              |
| <b>Trained for infection prevention</b> |     |      |     |     |                   |                   |
| Yes                                     | 79  | 21.0 | 23  | 55  | 1.78 (1.04, 3.05) | 1.79(1.00, 3.17)  |
| No                                      | 298 | 79.0 | 126 | 172 | 1:00              | 1:00              |

Table 3: Factors associated with practice of health workers with regard to the prevention and control of MDR-TB at Gondar University Hospital and Felege Hiwot Hospital Northwest Ethiopia.

| Variables                        | Practice |     | COR               | AOR                |
|----------------------------------|----------|-----|-------------------|--------------------|
|                                  | Yes      | No  |                   |                    |
| <b>Working site</b>              |          |     |                   |                    |
| Internal medicine                | 29       | 50  | 3.21(1.71, 6.04)  | 4.64 (1.99,10.81)  |
| Surgery                          | 5        | 41  | 0.67 (0.24, 1.88) | 1.11 (0.33, 3.74)  |
| Gynecology and Obstetrics        | 11       | 32  | 1.90 (0.84, 4.28) | 2.57 (0.95, 6.99)  |
| Pediatrics                       | 5        | 47  | 0.59 (0.21,1.63)  | 3.85 (1.11, 13.34) |
| OPD and Others                   | 24       | 133 | 1.00              | 1.00               |
| <b>Age (years)</b>               |          |     |                   |                    |
| <25                              | 13       | 117 | 1.00              | 1.00               |
| 26-30                            | 43       | 146 | 2.65 (1.36, 5.16) | 2.70 (1.27,5.76)   |
| >30                              | 18       | 40  | 4.05 (1.82, 9.00) | 4.42 (1.77,11.00)  |
| <b>Sex</b>                       |          |     |                   |                    |
| Male                             | 34       | 195 | 1.00              |                    |
| Female                           | 40       | 108 | 0.47 (0.28, 0.78) |                    |
| <b>Profession</b>                |          |     |                   |                    |
| MD                               | 8        | 51  | 1.00              | 1.00               |
| Nurse                            | 48       | 150 | 2.04 (0.90,4.60)  | 4.49 (1.03, 19.47) |
| Medical laboratory               | 7        | 37  | 1.20 (0.40, 3.62) | 5.21 (0.86, 31.51) |
| Other health professional        | 11       | 67  | 1.07 (0.44, 2.88) | 2.20 (0.25,10.73)  |
| <b>Educational level</b>         |          |     | 1.00              |                    |
| Diploma                          | 27       | 48  | 0.32 (0.18, 0.58) |                    |
| BSc                              | 40       | 219 | 0.31 (0.12, 0.81) |                    |
| Residence/masters and above      | 7        | 39  |                   |                    |
| <b>Staff categories</b>          |          |     |                   |                    |
| Teaching staff                   | 13       | 43  | 1.28 (0.65, 2.54) |                    |
| Hospital staff                   | 61       | 260 | 1.00              |                    |
| <b>Working experience (year)</b> |          |     |                   |                    |
| <3                               | 21       | 118 | 0.76 (0.41, 1.41) |                    |
| 3-6                              | 25       | 65  | 1.64 (0.88, 3.05) |                    |
| >6                               | 28       | 120 | 1.00              |                    |
| <b>Knowledge on MDR</b>          |          |     |                   |                    |
| Good                             | 20       | 129 | 2.00 (1.14, 3.50) |                    |
| Poor                             | 54       | 174 | 1.00              |                    |



# BMJ Open

## Knowledge and practice of health workers about control and prevention of multidrug-resistant tuberculosis in referral hospitals, Ethiopia: A cross-sectional study

|                                 |                                                                                                                                                                                                                                                                                                                                                                                                                                                                        |
|---------------------------------|------------------------------------------------------------------------------------------------------------------------------------------------------------------------------------------------------------------------------------------------------------------------------------------------------------------------------------------------------------------------------------------------------------------------------------------------------------------------|
| Journal:                        | <i>BMJ Open</i>                                                                                                                                                                                                                                                                                                                                                                                                                                                        |
| Manuscript ID                   | bmjopen-2018-022948.R1                                                                                                                                                                                                                                                                                                                                                                                                                                                 |
| Article Type:                   | Research                                                                                                                                                                                                                                                                                                                                                                                                                                                               |
| Date Submitted by the Author:   | 07-Aug-2018                                                                                                                                                                                                                                                                                                                                                                                                                                                            |
| Complete List of Authors:       | Alene, Kefyalew Addis; University of Gondar College of Medicine and Health Sciences<br>Adane, Akilew; University of Gondar<br>Yifiru, Sisay ; University of Gondar College of Medicine and Health Sciences, School of Medicine<br>Bitew, Bikes ; University of Gondar College of Medicine and Health Sciences, Institute of Public Health<br>Adane, Aynishet; University of Gondar College of Medicine and Health Sciences<br>Koye, Digsu Negese; University of Gondar |
| <b>Primary Subject Heading</b>: | Public health                                                                                                                                                                                                                                                                                                                                                                                                                                                          |
| Secondary Subject Heading:      | Infectious diseases, Epidemiology, Health services research, Medical education and training                                                                                                                                                                                                                                                                                                                                                                            |
| Keywords:                       | Tuberculosis < INFECTIOUS DISEASES, Public health < INFECTIOUS DISEASES, Health & safety < HEALTH SERVICES ADMINISTRATION & MANAGEMENT, Epidemiology < INFECTIOUS DISEASES, Infection control < INFECTIOUS DISEASES                                                                                                                                                                                                                                                    |
|                                 |                                                                                                                                                                                                                                                                                                                                                                                                                                                                        |

SCHOLARONE™  
Manuscripts

1  
2  
3 1 **Knowledge and practice of health workers about control and prevention of**  
4 **multidrug-resistant tuberculosis in referral hospitals, Ethiopia: A cross-sectional**  
5 **2 study**  
6  
7  
8

9 4 Kefyalew Addis Alene\*<sup>1</sup>, Akilew Awoke Adane<sup>1</sup>, Sisay Yifiru<sup>2</sup>, Bikes Destaw Bitew<sup>1</sup>, Aynishet Adane<sup>2</sup>,  
10 5 Digsu Negese Koye<sup>1</sup>  
11  
12

13 6  
14  
15  
16 7 <sup>1</sup>Institute of Public Health, College of Medicine and Health Sciences, University of Gondar, Gondar,  
17 8 Ethiopia.  
18

19  
20 9 <sup>2</sup>School of Medicine, College of Medicine and Health Sciences, University of Gondar, Gondar,  
21 10 Ethiopia.  
22  
23  
24

25 11  
26  
27  
28  
29  
30 13  
31  
32 14 E-mail address:  
33

34 15 KAA: [kefyalew.alene@anu.edu.au](mailto:kefyalew.alene@anu.edu.au)

35 16 AAA: [akilew24@gmail.com](mailto:akilew24@gmail.com)

36 17 SY: [sisaydr@yahoo.com](mailto:sisaydr@yahoo.com)

37 18 BD: [destaw2004@gmail.com](mailto:destaw2004@gmail.com)

38 19 AA: [ayne.2003@gmail.com](mailto:ayne.2003@gmail.com)

39 20 DNK: [digsuneg@gmail.com](mailto:digsuneg@gmail.com)  
40  
41  
42  
43  
44

45 23 **\*Correspondence:** Kefyalew Addis Alene, Institute of Public Health, College of Medicine and  
46 24 Health Sciences, University of Gondar, 196 Gondar, Gondar, Ethiopia. E-mail:  
47 25 [kefyalew.alene@anu.edu.au](mailto:kefyalew.alene@anu.edu.au); Tel: +61404705064  
48  
49  
50  
51  
52  
53  
54  
55

## 1 **Abstract**

2 **Objective:** The aim of this study was to assess the knowledge and practice of health workers about  
3 MDR-TB prevention and control.

4 **Study design and settings:** A cross-sectional study was conducted at Gondar University Referral  
5 Hospital and Felege Hiwot Referral Hospital.

6 **Participants:** Randomly selected health workers (i.e. medical doctor, nurse, health officer,  
7 pharmacy, medical laboratory and midwifery) were the study participants.

8 **Outcome measures:** The main outcomes were knowledge and self-reported practice of health  
9 workers about MDR-TB.

10 **Results:** A total of 377 health workers (with a response rate of 93.7%) participated in the study. The  
11 majority of respondents were nurses (52.5%, n=198) and medical doctors (15.6%, n= 59). The mean  
12 knowledge score was seven out of 10; 149 (39.5%) of respondents scored seven or more which was  
13 considered as good knowledge. MDR-TB knowledge of health workers was significantly associated  
14 with having a postgraduate degree (AOR=5.78; 95% CI: 2.33, 14.33), taking infection prevention  
15 training (AOR= 1.79; 95% CI: 1.00, 3.17) and having a history of TB (AOR= 1.85; 95% CI: 1.12,  
16 3.03). The mean self-reported practice score was four out of seven; one-fifth (19.6%) of respondents  
17 scored four or more which was considered as good practice. Self-reported practice of health workers  
18 was significantly associated with working at Internal Medicine (AOR= 4.64; 95% CI: 1.99, 10.81)  
19 and Pediatrics (AOR=3.85; 95% CI: 1.11, 13.34) wards, being in the age groups of 26-30 years  
20 (AOR= 2.70; 95% CI: 1.27, 5.76), and 30 years and above (AOR=4.42; 95% CI: 1.77, 11.00).

21 **Conclusions:** This study found low knowledge and self-reported practice score among health  
22 workers. MDR-TB knowledge of health workers was significantly associated with educational  
23 status, infection prevention training, and previous history of TB. This finding highlights the  
24 potential of providing MDR-TB training for health workers to increase their knowledge about MDR-  
25 TB.

## Strengths and limitations of this study

- This study is the first to explore the knowledge and practice of health workers regarding MDR-TB in two large referral hospitals in Ethiopia.
- The participants were selected randomly among different health workers such as medical doctor, nurses, health officer, pharmacy, medical laboratory and midwifery.
- There is a possibility that health workers may not report their actual practices as the information was self-reported.
- The findings from this study may not be generalizable to health workers in other hospitals in the country.

## 1 Introduction

2 Multidrug-resistant tuberculosis (MDR-TB) is defined as TB that is resistant to at least isoniazid and  
3 rifampin, the two most effective first-line TB drugs<sup>1</sup>. The emergence of MDR-TB is a major public  
4 health problem and is an obstacle for national and global TB control programs<sup>2</sup>. Globally, nearly  
5 half a million people are estimated to have MDR-TB annually, and only one-fourth of them get  
6 adequate treatment<sup>3-5</sup>. In 2016, there were an estimated 490 000 new cases of MDR-TB, and  
7 approximately 240 000 deaths from MDR-TB<sup>6 7</sup>. Treatment for MDR-TB has substantially longer  
8 duration, higher costs and more toxicity than the treatment for drug-susceptible TB<sup>8</sup>.

9 MDR-TB occurs in patients either due to the development of drug resistance during a course of first-  
10 line TB treatment (i.e. acquired MDR-TB)<sup>9</sup> or due to the transmission of a drug-resistant strain from  
11 an infectious patient to a susceptible host (i.e. primary MDR-TB)<sup>10</sup>. Acquired MDR-TB occurs as a  
12 result of sub-optimal first-line TB treatment related to health care providers or patient factors<sup>11 12</sup>.  
13 There is increasing evidence that primary MDR-TB is common and that many patients with MDR-  
14 TB had it from the start of treatment<sup>13-15</sup>. Inadequate knowledge and poor practice of health  
15 professional towards the prevention and control of MDR-TB may exacerbate the transmission of  
16 MDR-TB in health care settings<sup>16</sup>. Health workers have the potential to contact with MDR-TB  
17 patients and are very important stakeholders in health care settings to combat MDR-TB. Previous  
18 studies have been conducted to assess the knowledge and practices of health workers towards the  
19 prevention and control of TB<sup>17-21</sup>. However, there is a limited study regarding the knowledge and  
20 practices of health workers about the prevention and control of MDR-TB in Ethiopia.

21 Ethiopia is one of 30 high TB and MDR-TB burden countries<sup>22</sup>. The incidence of TB has decreased  
22 over time in Ethiopia following the implementation of different interventions, including the delivery  
23 of TB care by health extension workers and the expansion of directly observed therapies, short  
24 course (DOTS)<sup>23 24</sup>. However, the number of MDR-TB cases has increased over time and has  
25 become a challenge for the national TB control and prevention program<sup>24 25</sup>. Assessing the  
26 knowledge and practice of health workers on MDR-TB, and identifying factors associated with  
27 inadequate knowledge and low practice are important for the prevention and control of MDR-TB.  
28 Therefore, the aim of this study was to assess the knowledge and self-reported practice of health  
29 works related to MDR-TB and to identify factors associated with inadequate knowledge and low

1 self-reported practice of health workers toward the prevention and control of MDR-TB in Amhara  
2 region referral hospitals, Ethiopia.

### 3 **Methods**

#### 4 **Study design and setting**

5 This was a cross-sectional study conducted from March to May 2014 among health workers in  
6 Amhara regional referral hospitals. Amhara region is the second largest region in Ethiopia. The  
7 region has five referral hospitals, and the study was conducted in two (randomly selected) of these  
8 five referral hospitals: Gondar University Referral Hospital and Felege Hiwot Referral Hospital.  
9 During the study period, Amhara region referral hospitals have 304 medical doctors, 3790 nurses,  
10 434 public health officer and 287 midwiferies. TB is the leading cause of death among an infectious  
11 disease in the region<sup>26</sup>. TB detection rate (all forms), which is defined as the number of new and  
12 relapse TB cases notified in a given year, divided by the estimated number of incident TB cases for  
13 the same year, was 34% in Amhara region<sup>26</sup>.

14 Gondar University Hospital is the oldest hospital in the country which is located in Gondar, 750 km  
15 northwest of Addis Ababa (the capital city of Ethiopia). It provides health care services for a  
16 catchment population of approximately five million people in North Gondar and the adjacent zones.  
17 The hospital established the MDR-TB treatment centre in 2010 and it had around 80 MDR-TB  
18 patients during the data collection period.

19 Felege Hiwot Referral Hospital is located in Bahirdar (the capital city of Amhara National Regional  
20 State), 562 km northwest of Addis Ababa and 180 km southeast of Gondar. The hospital serves a  
21 catchment population of more than five million, and about 500 clients visit the hospital daily. The  
22 hospital has 273 beds and offers different specialized services in four major departments: Pediatric,  
23 Surgery, Gynecology and Obstetrics and Internal Medicine.

#### 24 **Sample size and sampling procedures**

25 The sample size for this study was determined using single population proportion formula, by taking  
26 the following assumptions: margin of error (5%), expected response rate (5%), and confidence  
27 interval (95%). There was no study in Ethiopia that showed the prevalence of good knowledge or  
28 practice of health workers about MDR-TB. Therefore, to allow for maximum variation, we took a

1 prevalence of 50%. Based on these assumptions, the final sample size was 402. To select the study  
2 participant random sampling technique was used. First, two of the five referral hospitals in Amhara  
3 region were selected randomly (i.e. Gondar University Referral Hospital, and Felege Hiwot Referral  
4 Hospital). Then the sample size was proportionally allocated to these hospitals based on their  
5 number of health workers. The list of health workers (i.e. sampling frame) was obtained from the  
6 office of human resource of each hospital. Finally, the sample was selected from each hospital by  
7 simple random sampling technique. The sample includes a medical doctor, nurse, health officer,  
8 pharmacy, medical laboratory and midwifery. Those health workers who were temporarily  
9 employed in the hospitals were excluded from the study.

### 10 **Data collection instrument**

11 The questionnaire for this study was developed by the research team based on the Ethiopia  
12 Programmatic Management of Drug-resistant Tuberculosis Guideline 2013<sup>27</sup>, the 2014 World Health  
13 Organization (WHO) Guidelines for the Programmatic Management of Drug-resistant  
14 Tuberculosis<sup>28</sup>, and previous studies<sup>29-33</sup>. The details of the questionnaire are available as an  
15 additional file in the appendix. The questionnaire contains the following section: socio-  
16 demographic profile of the participants (such as age, sex, marital status, level of education, years of  
17 experience, type of occupation); and questions about knowledge and practice of health workers  
18 about MDR-TB. Knowledge of health workers was assessed based on the number of correct  
19 answers provided to 10 closed-ended questions (i.e. multiple choice, yes/no and true/false) on the  
20 definition, cause, diagnosis, treatment and prevention of MDR-TB. Each attracts a score of one (for  
21 a correct answer) or zero (for a wrong answer). The knowledge score was calculated for each study  
22 participants by summing up the points of all questions, and the score ranging from 0 to 10. Then  
23 knowledge score was categorized into good and poor score if it is equal to or above the mean and  
24 below the mean, respectively. Similarly, the self-reported practice of health workers about MDR-TB  
25 prevention and control was assessed by seven questions. The practice questions were about access to  
26 the MDR-TB guideline, implementation of cross ventilation in the hospital, provision of health  
27 education to the patients about MDR-TB, and access and use of Masks N95. If there was a self-  
28 reported practice earned a score of one otherwise zero. Participants who scored equal to or above the  
29 mean were considered as having a good practice and below the mean considered as a poor practice.

1 To improve the adequacy, accuracy and appropriateness of the questionnaire content and face  
2 validation was performed. Prior to the main survey, the questioner was pre-tested among 20 health  
3 workers (i.e. 5% of the sample) in other hospitals. The questionnaire was administered to study  
4 participants with the help of data collectors. The questionnaires were then collected after one or two  
5 days. The questionnaire front page contains information, describing the survey and asking for their  
6 voluntary participation. By reading and responding, they gave their consent.

## 7 **Data analysis**

8 The data were entered and analyzed using the Statistical Package for Social Science (SPSS) version  
9 20.0. The data were cleaned and checked for accuracy. Percentages and numbers were used to  
10 summarize categorical data. Mean and standard deviation (SD) were used to describe normally  
11 distributed continuous variables. A bivariate logistic regression model was first fitted, and the  
12 variables which had a p-value <0.2 in the bivariate analysis were fitted in the final multivariable  
13 logistic regression model. Variables with a p-value <0.05 in the final multivariable logistic  
14 regression model were considered significantly associated with the dependent variables (i.e.  
15 knowledge and practice). Crude and adjusted odds ratios (OR) with 95% CI were calculated to  
16 measure the strength of association between the dependent and independent variables.

## 17 **Ethics Approval**

18 This study was approved by the University of Gondar Ethics Review Board (reference number  
19 RPC/59/2014) on 26 March 2014 before initiation of the study. Permission was granted to access  
20 health workers from each hospital administrations. Information about the purpose of the study, and  
21 the rights of the study participant not to complete the questionnaire, if they are not interested about  
22 the questions, was provided on the cover page of the questionnaire. Hence, the return of the  
23 questionnaire was considered as getting written consent from each study participant. In order to keep  
24 confidentiality of any information provided by study participants, personal identifiers such as name  
25 and address were not collected.

## 26 **Patient and public involvement**

27 No patients or public were involved in this research.

## 28 **Results**



## 1 Socio-demographic characteristics

2 A total of 377 health workers participated in the study, with a response rate of 93.7%. Table 1 shows  
3 the demographic profile of the respondents. The majority of respondents were nurses (52.5%,  
4 n=198) and medical doctors (15.6%, n= 59). The mean age of the participants was 27.6 ( $\pm 4.7$  SD)  
5 years. Most of the respondents were males (60.7%, n=229) and BSc degree holders (62.6%, n=236).

6 One-third (36.6%, n=138) of the respondents were previously diagnosed for TB, and 140 (37.1%)  
7 were working at outpatient departments (OPD). The majority (80%, n=298) of study participants  
8 were not trained for infection prevention within the last 12 months. One hundred and forty-eight  
9 (39.3%) of respondents had work experience of more than six years.

## 10 Knowledge of health workers about MDR-TB

11 The mean knowledge score was seven points out of a total possible score of 10 points. Two-fifth  
12 (39.5%) (95% CI: 35.0%, 44.3%) of respondents scored equal to or more than the mean score which  
13 was categorized as good knowledge. Table 2 shows the number and percentage of correct responses  
14 of health workers for knowledge questions. The majority of respondents knew that MDR-TB occurs  
15 when TB treatments are not properly administered (97.6%), culture with drug susceptibility testing  
16 (DST) is the best diagnostic methods for MDR-TB (94.7%), and MDR-TB is transmitted by droplet  
17 spread (91.5%). Knowledge was less accurate regarding the treatment and symptoms of MDR-TB.  
18 Less than half of the respondents answered questions correctly about the nationally recommended  
19 treatment regimen (44.6%) and the most common symptoms (39.3%) of MDR-TB. Knowledge gap  
20 was also observed among respondents regarding the duration of MDR-TB treatment (55.4%) [Table  
21 2].

22 In the bivariate analysis, sex, working sit, profession, educational status, staff categories, previous  
23 history of TB, and taking infection prevention training were significantly associated with knowledge  
24 of respondents about MDR-TB. However, in the stepwise multivariate analysis, educational level,  
25 previous history of TB, and taking infection prevention training were remained significantly  
26 associated with knowledge of respondents about MDR-TB after controlling other factors (Table 3).

27 Accordingly, health workers who had a postgraduate degree were more likely to have good  
28 knowledge about MDR-TB than health workers who had a diploma [AOR 5.78 (95% CI: 2.33,

1 14.33)]. Those health workers who had been trained for infection prevention were more likely to  
2 have good knowledge about MDR-TB than those health workers who had not been trained for  
3 infection prevention [AOR 1.79(95% CI: 1.00, 3.17)]. Similarly, health workers who had a history of  
4 TB were more likely to have good knowledge about MDR-TB than health workers who had no a  
5 history of TB (AOR 1.85 (95% CI: 1.12, 3.03)).

## 6 **Practices of health workers towards the prevention and control of MDR-TB**

7 A total of 123 (32.6%) respondents reported having access to the MDR-TB guideline, and 110  
8 (29.17%) mentioned that they referred to the guidelines when providing care to TB or MDR-TB  
9 suspected patients. One hundred and sixty-three (43.2%) respondents reported the implementation  
10 of cross-ventilation in their working room. More than a quarter 103 (27.3%, n=103) of participants  
11 reported that they always wore a protective mask (N95) when carrying out clinical procedures and  
12 attending patients. The mean self-reported practice score was four points out of a total possible score  
13 of seven points. Less than a quarter (19.6%; 95% CI: 16.2, 23.8%) of health workers were scored  
14 equal to or above the mean score which was categorized as good practice towards the prevention and  
15 control of MDR-TB.

16 To identify factors associated with the self-reported practice of MDR-TB, logistic regression models  
17 were fitted. In the bivariate analysis, working site, the age of respondents, sex, profession,  
18 educational level, and knowledge about MDR-TB were significantly associated with the self-  
19 reported practice. However, in the multivariate analysis, working site, the age of respondents, and  
20 profession were significantly associated with self-reported practice (Table 4). Health workers who  
21 were working at Internal Medicine [AOR=4.64 (95% CI: 1.99, 10.81) and Pediatric [AOR=3.85  
22 (95% CI: 1.11, 13.34)] wards were more likely to have good self-reported practice than health  
23 workers who were working at OPD. Those health workers in the age group of 26-30 years [AOR=  
24 2.70 (95%CI: 1.27, 5.76)] and >30 years [AOR=4.42 (95% CI: 1.77, 11.08)] were more likely to  
25 have good self-reported practice as compared to those health workers with the age group of <25  
26 years. Nurses were more likely to have good self-reported practice than medical doctors [AOR= 4.49  
27 (95% CI: 1.03, 19.47)].

## 28 **Discussion**

1 Health workers have a key role in the prevention and control of MDR-TB, especially in resource-  
2 limited settings such as Ethiopia. In our study, knowledge gaps were identified with regard to the  
3 definition of MDR-TB, the combination of nationally recommend drug and the duration of MDR-TB  
4 treatment. Similar findings were reported from previous studies<sup>34 35</sup>. Health workers' knowledge  
5 about MDR-TB were associated with an increased level of education and taking of infection  
6 prevention training. Health workers who had a postgraduate degree had better knowledge about  
7 MDR-TB than health workers who had a diploma. This disparity was even more pronounced in  
8 health professionals who had been trained for infection prevention in the last 12 months and who had  
9 been previously diagnosed for TB. This finding highlighted the importance of providing infection  
10 prevention training for health works to increase their knowledge about MDR-TB.

11 Our study also found that only one-fourth of health works had good self-reported practice towards  
12 the prevention and control of MDR-TB. This low MDR-TB prevention and control practice among  
13 health workers is particularly risky in high TB burden countries such as Ethiopia because outbreaks  
14 of MDR-TB may occur in the hospitals. A high rate of hospital transmission of MDR-TB has been  
15 reported in previous studies<sup>36 37</sup>.

16 With regard to the practice of referring to the treatment guidelines, it is only one-third (32.6%) of  
17 participants had access to the MDR-TB guideline in the hospitals; and less than a third (29.17%) of  
18 participants referred to these guidelines while treating the patients. Although this finding is  
19 consistent with a report by other studies that a high number of healthcare practitioners fail to comply  
20 with clinical practice guidelines, this is noteworthy finding<sup>38 39</sup>. It is important that the regional  
21 health bureau and hospital administration address this issue by making the MDR-TB guidelines  
22 available to all health workers in the healthcare settings.

23 Although this study did not assess whether health workers used protective mask appropriately  
24 through observation, slightly more than a quarter (27.3%) of participants reported that they always  
25 wore a protective mask when carrying out clinical procedures and attending patients. This is also a  
26 very low percentage, as all health workers should use protective masks when dealing with TB  
27 patients. This may indicate that health workers, their family members, their patients and all other  
28 persons they interact with will be at higher risk of infection with MDR-TB<sup>40 41</sup>. This is especially  
29 important for medical doctors, health officers and nurses who have regular contact with the patients.

1 This study has several limitations. First, there is a possibility that health workers may not report their  
2 actual practices (due to social desirability bias) as the information was self-reported. Second, the  
3 findings of this study may not be generalizable to health workers in other hospitals of the country as  
4 the study was limited only to two referral hospitals in Amhara region. Third, there could be a  
5 possibility of selection bias as the number of health workers who had prior TB appeared to be  
6 exceptionally high (36.6%), suggesting they may have been more interested to participate in the  
7 study. Fourth, given that the study was based on a cross-sectional study design, it is important to  
8 acknowledge that a temporal relationship between the explanatory and outcome variable could not  
9 be established.

## 10 **Conclusions**

11 This study has revealed poor knowledge and practice of health workers about MDR-TB prevention  
12 and control in Amhara region referral hospitals, Ethiopia. The study also found that higher  
13 educational level, provision of training, and previous history of TB were significantly associated  
14 with good knowledge of health workers. This finding highlighted the importance of providing  
15 infection prevention training for health works to increase their knowledge about MDR-TB.

16 **Acknowledgements:** The authors would like to acknowledge the University of Gondar for providing  
17 us financial support to undertake this study. We also thank all health workers and data collectors  
18 who participated in this study.

19 **Contributors:** KAA designed the study, participated in the data collection, analyzed the data, and  
20 drafted the manuscript. AAA participated in the data collection and revised the draft manuscript. SY,  
21 BDB, AA and DNK critically revised the manuscript for methodological and intellectual content.  
22 All authors read and approved the final version of the manuscript.

23 **Funding:** This research was supported by funding from the University of Gondar. The funders had  
24 no role in study design, data collection and analysis, interpretation of data, the decision to publish, or  
25 preparation of the manuscript.

26 **Competing interests:** The authors declared that they have no competing interests.

27 **Patient consent:** Not required.

1  
2  
3  
4  
5  
6  
7  
8  
9  
10  
11  
12  
13  
14  
15  
16  
17  
18  
19  
20  
21  
22  
23  
24  
25  
26  
27  
28  
29  
30  
31  
32  
33  
34  
35  
36  
37  
38  
39  
40  
41  
42  
43  
44  
45  
46  
47  
48  
49  
50  
51  
52  
53  
54  
55  
56  
57  
58  
59  
60

1 **Data sharing statement:** The data that support the findings of this study are available from the  
2 corresponding author on reasonable request.

## 7 **References**

- 8 1. WHO. Definitions and reporting framework for tuberculosis – 2013 revision (updated 2014)  
9 Geneva, Switzerland World Health Organization 2013.
- 10 2. WHO. *Global Tuberculosis Control SURVEILLANCE, PLANNING, FINANCING*. Switzerland:  
11 WHO Press, 2008.
- 12 3. Gandhi N. Extensively drug-resistant tuberculosis as a cause of death in patients co-infected with  
13 tuberculosis and HIV in a rural area of South Africa. *Lancet* 2006;**368**(9547):1575-80.
- 14 4. Shah N. Worldwide emergence of extensively drug-resistant tuberculosis *Emerging Infectious  
15 Diseases* 2007;**13**(3):380-87.
- 16 5. Migliori G. Extensively drug-resistant tuberculosis, Italy and Germany *Emerging Infectious  
17 Diseases* 2007;**13**(5):780-82.
- 18 6. WHO. *Global tuberculosis report 2015*. . 20th ed. Geneva, Switzerland: World Health  
19 Organization 2015.
- 20 7. WHO. *Global tuberculosis report 2017*. In: WHO, ed. Geneva: World Health Organization, 2017.
- 21 8. WHO. *Companion handbook to the WHO guidelines for the programmatic management of drug-  
22 resistant tuberculosis*. Geneva, Switzerland World Health Organization, 2014.
- 23 9. Caminero J. Multidrug-resistant tuberculosis: epidemiology, risk factors and case finding [State of  
24 the art series. Drug-resistant tuberculosis. Edited by CY. Chiang. Number 4 in the series].  
25 *The International Journal of Tuberculosis and Lung Disease* 2010;**14**(4):382-90.
- 26 10. Dye C. Doomsday postponed? Preventing and reversing epidemics of drug-resistant tuberculosis.  
27 *Nature Reviews Microbiology* 2009;**7**(1):81-87.
- 28 11. Faustini A, Hall AJ, Perucci CA. Risk factors for multidrug resistant tuberculosis in Europe: a  
29 systematic review. *Thorax* 2006;**61**(2):158-63.
- 30 12. Han L, Sloutsky A, Canales R, et al. Acquisition of drug resistance in multidrug-resistant  
31 *Mycobacterium tuberculosis* during directly observed empiric retreatment with standardized  
32 regimens. *The International Journal of Tuberculosis and Lung Disease* 2005;**9**(7):818-21.
- 33 13. Dheda K, Limberis JD, Pietersen E, et al. Outcomes, infectiousness, and transmission dynamics  
34 of patients with extensively drug-resistant tuberculosis and home-discharged patients with  
35 programmatically incurable tuberculosis: a prospective cohort study. *The lancet Respiratory  
36 medicine* 2017.
- 37 14. Ragonnet R, Trauer JM, Denholm JT, et al. High rates of multidrug-resistant and rifampicin-  
38 resistant tuberculosis among re-treatment cases: where do they come from? *BMC Infectious  
39 Diseases* 2017;**17**(1):36.
- 40 15. Shah NS, Auld SC, Brust JC, et al. Transmission of Extensively Drug-Resistant Tuberculosis in  
41 South Africa. *New England Journal of Medicine* 2017;**376**(3):243-53.

16. Caminero JA. Multidrug-resistant tuberculosis: epidemiology, risk factors and case finding [State of the art series. Drug-resistant tuberculosis. Edited by C-Y. Chiang. Number 4 in the series]. *The International Journal of Tuberculosis and Lung Disease* 2010;**14**(4):382-90.
17. van der Westhuizen H-M, Kotze K, Narotam H, et al. Knowledge, attitudes and practices regarding TB infection control among health science students in a TB-endemic setting. *International Journal of Infection Control* 2015;**11**(4).
18. von Delft A, Dramowski A, Sifumba Z, et al. Exposed, but not protected: More is needed to prevent drug-resistant tuberculosis in healthcare workers and students. *Clinical Infectious Diseases* 2016;**62**(suppl\_3):S275-S80.
19. Nathavitharana RR, Peters J, Lederer P, et al. Engaging health-care workers to reduce tuberculosis transmission. *The Lancet infectious diseases* 2016;**16**(8):883-85.
20. Nathavitharana RR, Bond P, Dramowski A, et al. Agents of change: the role of healthcare workers in the prevention of nosocomial and occupational tuberculosis. *La Presse Médicale* 2017;**46**(2):e53-e62.
21. Gizaw GD, Alemu ZA, Kibret KT. Assessment of knowledge and practice of health workers towards tuberculosis infection control and associated factors in public health facilities of Addis Ababa, Ethiopia: A cross-sectional study. *Archives of public health* 2015;**73**(1):15.
22. WHO. Use of high burden country lists for tuberculosis by WHO in the post-2015 era. In: programme WHOgt, ed. Geneva, Switzerland, 2015.
23. Economist. Tackling Tuberculosis in Ethiopia: a community-based approach. In: Unit TEI, ed., 2016.
24. MOH. Annual Tuberculosis Bulletin 2013. In: Health EFMO, ed. An extract of five years' TB, TB/HIV and Leprosy Control Program Analysis (EFY 2000 -2005). Addis Ababa, Ethiopia: Health Promotion and Diseases Prevention Directorate, 2013.
25. Alene KA, Viney K, McBryde ES, et al. Treatment outcomes in patients with multidrug-resistant tuberculosis in north-west Ethiopia. *Tropical Medicine & International Health* 2017.
26. Misganaw A, Haregu TN, Deribe K, et al. National mortality burden due to communicable, non-communicable, and other diseases in Ethiopia, 1990–2015: findings from the Global Burden of Disease Study 2015. *Population health metrics* 2017;**15**(1):29.
27. Biruck Kebede BA, Anteneh Kassa, Wubaye Walelgne, Andargachew Kumsa, Addisalem Yilma, Lelisa Fekadu, Birru Shigut, Kasech Sintayehu, Solomon Hassen, Etsegenet, Endale Mengesha, Abebaw Kebede. Guidelines on Programmatic Management of Drug Resistant Tuberculosis in Ethiopia. In: Health FDROEMO, ed. Addis Ababa, Ethiopia 2013.
28. WHO. Companion handbook to the WHO guidelines for the programmatic management of drug-resistant tuberculosis. Geneva, Switzerland, 2014.
29. Hashim D, Al Kubaisy W, Al Dulayme A. Knowledge, attitudes and practices survey among health care workers and tuberculosis patients in Iraq. 2003.
30. Hoa NP, Chuc NTK, Thorson A. Knowledge, attitudes, and practices about tuberculosis and choice of communication channels in a rural community in Vietnam. *Health Policy* 2009;**90**(1):8-12.
31. Kiefer EM, Shao T, Carrasquillo O, et al. Knowledge and attitudes of tuberculosis management in San Juan de Lurigancho district of Lima, Peru. *The Journal of Infection in Developing Countries* 2009;**3**(10):783-88.
32. Kanjee Z, Catterick K, Moll A, et al. Tuberculosis infection control in rural South Africa: survey of knowledge, attitude and practice in hospital staff. *Journal of Hospital Infection* 2011;**79**(4):333-38.

- 1  
2  
3  
4  
5  
6  
7  
8  
9  
10  
11  
12  
13  
14  
15  
16  
17  
18  
19  
20  
21  
22  
23  
24  
25  
26  
27  
28  
29  
30  
31  
32  
33  
34  
35  
36  
37  
38  
39  
40  
41  
42  
43  
44  
45  
46  
47  
48  
49  
50  
51  
52  
53  
54  
55  
56  
57  
58  
59  
60
- 1 33. van der Werf MJ, Langendam MW, Huitric E, et al. Knowledge of tuberculosis treatment  
2 prescription of health workers: A systematic review. *European Respiratory Journal*  
3 2011;erj01256-2011.  
4  
5 34. Malangu N, Adebajo OD. Knowledge and practices about multidrug-resistant tuberculosis  
6 amongst healthcare workers in Maseru. *African journal of primary health care & family*  
7 *medicine* 2015;7(1):1-5.  
8  
9 35. Tefera G, Seid Y. Actual practice of healthcare providers towards prevention and control of  
10 Multidrug-resistant tuberculosis (MDR-TB) at Borumeda Hospital, Ethiopia. *African Journal*  
11 *of Pharmacy and Pharmacology* 2017;11(12):152-60.  
12  
13 36. Crudu V, Merker M, Lange C, et al. Nosocomial transmission of multidrug-resistant  
14 tuberculosis. *The International Journal of Tuberculosis and Lung Disease* 2015;19(12):1520-  
15 23.  
16  
17 37. Bantubani N, Kabera G, Connolly C, et al. High rates of potentially infectious tuberculosis and  
18 multidrug-resistant tuberculosis (MDR-TB) among hospital inpatients in KwaZulu Natal,  
19 South Africa indicate risk of nosocomial transmission. *PloS one* 2014;9(3):e90868.  
20  
21 38. Cabana MD RC, Powe NR, et al. Why don't physicians follow clinical practice guidelines? A  
22 framework for improvement. *JAMA* 1999;282(15):458-1465.  
23  
24 39. Holtz TH LJ, Laserson KF, et al. Risk factors associated with default from multidrug-resistant  
25 tuberculosis treatment. *Int J Tuberc Lung Dis* 2006;10(6):649-55.  
26  
27 40. Schaaf HS MA, Dheda K. Multidrug- and extensively drug-resistant tuberculosis in Africa and  
28 South America: Epidemiology, diagnosis and management in adults and children. *Clin Chest*  
29 *Med* 2009;30(4):667-83.  
30  
31 41. Zhao M LX, Xu P, et al. . Transmission of MDR and XDR tuberculosis in Shanghai, China.  
32 *PLoS ONE* 2009;4( 2):4370.  
33  
34

1  
2 1  
3  
4 2  
5  
6  
7 3  
8  
9  
10 4  
11  
12 5 Table1: Socio-demographic characteristics of health workers at Gondar University Referral Hospital  
13 and Felege Hiwot Referral Hospital, Northwest Ethiopia  
14 6

| Variables                               | Number | Percent |
|-----------------------------------------|--------|---------|
| <b>Working site</b>                     |        |         |
| Internal medicine                       | 79     | 21.0    |
| Surgery                                 | 46     | 12.2    |
| Gynaecology and Obstetrics              | 43     | 11.4    |
| Paediatrics                             | 52     | 13.8    |
| OPD and Others                          | 157    | 41.6    |
| <b>Age (year)</b>                       |        |         |
| <25                                     | 130    | 34.5    |
| 26-30                                   | 189    | 50.1    |
| >30                                     | 58     | 15.4    |
| <b>Sex</b>                              |        |         |
| Male                                    | 229    | 60.7    |
| Female                                  | 148    | 39.3    |
| <b>Marital status</b>                   |        |         |
| Married                                 | 155    | 41.9    |
| Not married                             | 222    | 49.1    |
| <b>Profession</b>                       |        |         |
| MD                                      | 59     | 15.6    |
| Nurse                                   | 198    | 52.5    |
| Medical laboratory                      | 44     | 11.7    |
| Other health professionals              | 76     | 20.1    |
| <b>Educational level</b>                |        |         |
| Diploma                                 | 75     | 19.9    |
| BSc degree                              | 236    | 62.6    |
| Postgraduate and above                  | 66     | 17.5    |
| <b>Staff categories</b>                 |        |         |
| Teaching staff                          | 56     | 14.9    |
| Hospital staff                          | 321    | 85.1    |
| <b>Working experience (years)</b>       |        |         |
| <3                                      | 139    | 36.9    |
| 3-6                                     | 90     | 23.9    |
| >6                                      | 148    | 39.3    |
| <b>Ever diagnosed for TB</b>            |        |         |
| Yes                                     | 138    | 36.6    |
| No                                      | 239    | 63.4    |
| <b>Trained for infection prevention</b> |        |         |



|     |     |      |
|-----|-----|------|
| Yes | 79  | 21.0 |
| No  | 298 | 79.0 |

Table 2: Number and percent (%) of correct response among health profession towards all knowledge questions

| <b>The correct response to knowledge questions</b>                                    | <b>Number</b> | <b>Percent</b> |
|---------------------------------------------------------------------------------------|---------------|----------------|
| MDR-TB is defined as TB that is resistant to isoniazid and rifampicin                 | 264           | 70.0           |
| MDR-TB is transmitted by droplet spread                                               | 345           | 91.5           |
| MDR-TB occur when TB treatments are not properly administered                         | 357           | 94.7           |
| All people with MDR-TB infection may not have symptoms                                | 148           | 39.3           |
| A cough or chest pain is the most common symptom of pulmonary MDR-TB                  | 221           | 58.6           |
| Culture with drug susceptibility test (DST) is the best diagnostic methods for MDR-TB | 368           | 97.6           |
| Culture conversion is the major element to assess MDR-TB treatment cure               | 241           | 63.9           |
| MDR-TB treatment takes 18 months and above                                            | 209           | 55.4           |
| Nationally recommended MDR-TB treatment regimen                                       | 168           | 44.6           |
| Putting on N95 can reduce the risk of MDR-TB transmission                             | 314           | 83.3           |

1  
2 1  
3  
4 2  
5 3  
6  
7 4  
8  
9 5  
10  
11 6  
12  
13 7  
14  
15 8 Table 3: Factors associated with knowledge of health workers about MDR-TB at Gondar University  
16 9 Referral Hospital and Felege Hiwot Referral Hospitals, Northwest Ethiopia  
17

| Variables                         | MDR-TB Knowledge |      | COR (95% CI)       | AOR (95% CI)       |
|-----------------------------------|------------------|------|--------------------|--------------------|
|                                   | Good             | Poor |                    |                    |
| <b>Working site</b>               |                  |      |                    |                    |
| Internal medicine                 | 37               | 40   | 1:00               |                    |
| Surgery                           | 17               | 29   | 0.60 (0.28,1.26)   |                    |
| Gynaecology and Obstetrics        | 17               | 26   | 0.67 (0.31, 1.42)  |                    |
| Paediatrics                       | 24               | 28   | 0.87 (0.43, 1.77)  |                    |
| OPD and Others                    | 52               | 105  | 0.50 (0.29, 0.88)  |                    |
| <b>Age (year)</b>                 |                  |      |                    |                    |
| <25                               | 50               | 80   | 1:00               |                    |
| 26-30                             | 80               | 109  | 1.17 (0.74, 1.85)  |                    |
| >30                               | 19               | 39   | 0.77 (0.40, 1.49)  |                    |
| <b>Sex</b>                        |                  |      |                    |                    |
| Male                              | 103              | 126  | 1.81 (1.17, 2.80)  |                    |
| Female                            | 46               | 102  | 1:00               |                    |
| <b>Marital status</b>             |                  |      |                    |                    |
| Married                           | 57               | 98   | 0.82 (0.53, 1.25)  |                    |
| Not married                       | 92               | 130  | 1:00               |                    |
| <b>Profession</b>                 |                  |      |                    |                    |
| MD                                | 42               | 17   | 1:00               |                    |
| Nurse                             | 70               | 128  | 0.22 (0.11,0.41)   |                    |
| Medical laboratory                | 13               | 31   | 0.17 (0.07,0.40)   |                    |
| Other health professionals        | 24               | 52   | 0.18 (0.08,0.39)   |                    |
| <b>Educational level</b>          |                  |      |                    |                    |
| Diploma                           | 16               | 59   | 1:00               | 1:00               |
| BSc                               | 99               | 157  | 2.32 (1.26, 4.26)  | 1.58 (0.81, 3.05)  |
| Postgraduate above                | 34               | 12   | 10.44 (4.42,24.67) | 5.78 (2.33, 14.33) |
| <b>Staff categories</b>           |                  |      |                    |                    |
| Teaching staff                    | 35               | 21   | 3.00 (1.68, 5.44)  |                    |
| Hospital staff                    | 114              | 207  | 1:00               |                    |
| <b>Working experience (years)</b> |                  |      |                    |                    |
| <3                                | 59               | 80   | 1.17 (0.73, 1.88)  |                    |
| 3-6                               | 33               | 57   | 0.92 (0.53, 1.58)  |                    |
| >6                                | 57               | 91   | 1:00               |                    |
| <b>Ever diagnosed for TB</b>      |                  |      |                    |                    |

|                                         |     |     |                   |                   |
|-----------------------------------------|-----|-----|-------------------|-------------------|
| Yes                                     | 35  | 103 | 2.68 (1.69, 4.25) | 1.85 (1.12, 3.03) |
| No                                      | 114 | 125 | 1:00              | 1:00              |
| <b>Trained for infection prevention</b> |     |     |                   |                   |
| Yes                                     | 23  | 55  | 1.78 (1.04, 3.05) | 1.79 (1.00, 3.17) |
| No                                      | 126 | 172 | 1:00              | 1:00              |

Table 4: Factors associated with the self-reported practice of health workers regarding the prevention and control of MDR-TB at Gondar University Referral Hospital and Felege Hiwot Referral Hospital, Northwest Ethiopia.

| Variables                        | Practice |     | COR (95% CI)      | AOR (95% CI)       |
|----------------------------------|----------|-----|-------------------|--------------------|
|                                  | Yes      | No  |                   |                    |
| <b>Working site</b>              |          |     |                   |                    |
| Internal medicine                | 29       | 50  | 3.21 (1.71, 6.04) | 4.64 (1.99,10.81)  |
| Surgery                          | 5        | 41  | 0.67 (0.24, 1.88) | 1.11 (0.33, 3.74)  |
| Gynaecology and Obstetrics       | 11       | 32  | 1.90 (0.84, 4.28) | 2.57 (0.95, 6.99)  |
| Paediatrics                      | 5        | 47  | 0.59 (0.21,1.63)  | 3.85 (1.11, 13.34) |
| OPD and Others                   | 24       | 133 | 1.00              | 1.00               |
| <b>Age (years)</b>               |          |     |                   |                    |
| <25                              | 13       | 117 | 1.00              | 1.00               |
| 26-30                            | 43       | 146 | 2.65 (1.36, 5.16) | 2.70 (1.27,5.76)   |
| >30                              | 18       | 40  | 4.05 (1.82, 9.00) | 4.42 (1.77,11.00)  |
| <b>Sex</b>                       |          |     |                   |                    |
| Male                             | 34       | 195 | 1.00              |                    |
| Female                           | 40       | 108 | 0.47 (0.28, 0.78) |                    |
| <b>Profession</b>                |          |     |                   |                    |
| MD                               | 8        | 51  | 1.00              | 1.00               |
| Nurse                            | 48       | 150 | 2.04 (0.90,4.60)  | 4.49 (1.03, 19.47) |
| Medical laboratory               | 7        | 37  | 1.20 (0.40, 3.62) | 5.21 (0.86, 31.51) |
| Other health professionals       | 11       | 67  | 1.07 (0.44, 2.88) | 2.20 (0.25,10.73)  |
| <b>Educational level</b>         |          |     |                   |                    |
| Diploma                          | 27       | 48  | 0.32 (0.18, 0.58) |                    |
| BSc                              | 40       | 219 | 0.31 (0.12, 0.81) |                    |
| Residence/masters and above      | 7        | 39  |                   |                    |
| <b>Staff categories</b>          |          |     |                   |                    |
| Teaching staff                   | 13       | 43  | 1.28 (0.65, 2.54) |                    |
| Hospital staff                   | 61       | 260 | 1.00              |                    |
| <b>Working experience (year)</b> |          |     |                   |                    |
| <3                               | 21       | 118 | 0.76 (0.41, 1.41) |                    |
| 3-6                              | 25       | 65  | 1.64 (0.88, 3.05) |                    |
| >6                               | 28       | 120 | 1.00              |                    |
| <b>Knowledge on MDR</b>          |          |     |                   |                    |
| Good                             | 20       | 129 | 0.50 (0.28, 0.88) |                    |
|                                  | 54       | 174 | 1.00              |                    |

1  
2  
3  
4  
5  
6  
7  
8  
9  
10  
11  
12  
13  
14  
15  
16  
17  
18  
19  
20  
21  
22  
23  
24  
25  
26  
27  
28  
29  
30  
31  
32  
33  
34  
35  
36  
37  
38  
39  
40  
41  
42  
43  
44  
45  
46  
47  
48  
49  
50  
51  
52  
53  
54  
55  
56  
57  
58  
59  
60

|      |  |  |  |  |
|------|--|--|--|--|
| Poor |  |  |  |  |
|------|--|--|--|--|

1

For peer review only

1  
2  
3  
4  
5  
6  
7 My name is ....., I am working for the University of Gondar. We are collecting data  
8 on health professionals.  
9

10  
11 This self-administered questionnaire is designed to assess the knowledge and practices of health  
12 professionals about the prevention and control of multidrug-resistant tuberculosis (MDR-TB) in  
13 Amhara region referral hospitals. You are selected randomly to participate in this study and you  
14 would be asked some questions about MDR-TB. The answers will be used only for the purpose of  
15 this study. You will not request to write your name nor your addresses. Hence, readers will not be  
16 able to find out who gave certain answers.  
17  
18  
19  
20  
21

22  
23 I would be pleased if you participated, but your participation is voluntary. If you don't want to  
24 participate, please feel free to say NO, and not complete this self-administered questionnaire.  
25  
26  
27

28  
29 Would you agree to participate in this study? Yes  No   
30  
31  
32  
33  
34  
35  
36  
37  
38  
39

40 If yes, signature \_\_\_\_\_  
41  
42  
43  
44  
45  
46  
47  
48  
49  
50  
51  
52  
53  
54  
55  
56  
57  
58  
59  
60

| <b>I. Socio-demographic characteristics of the respondent</b> |                                                                          |                                                                                                                             |
|---------------------------------------------------------------|--------------------------------------------------------------------------|-----------------------------------------------------------------------------------------------------------------------------|
| 000                                                           | Place of data collection                                                 | 1. University of Gondar Referral Hospital<br>2. Felege Hiwot Referral Hospital                                              |
| 101                                                           | In which Ward/OPD do you currently work?                                 | 3. Internal medicine<br>4. Surgery<br>5. Gynaecology and Obstetrics<br>6. Paediatrics<br>7. Others (specify):- -----        |
| 102                                                           | What is your age?                                                        | _____ in years                                                                                                              |
| 103                                                           | What is your gender?                                                     | 1. Male<br>2. Female                                                                                                        |
| 104                                                           | What is your religion?                                                   | 1. Orthodox<br>2. Muslim<br>3. Protestant<br>4. Catholic<br>5. Others (specify) _____                                       |
| 105                                                           | What is your marital status?                                             | 1. Single<br>2. Married<br>3. Divorced<br>4. Widowed<br>5. Separated                                                        |
| 106                                                           | What is your profession?                                                 | 1. Medical Doctor<br>2. Nurse<br>3. Health Officer<br>4. Pharmacy<br>5. Medical Laboratory<br>6. Midwife<br>7. Others _____ |
| 107                                                           | What is your highest level of educational attainment?                    | 1. Diploma<br>2. Bachelor degree<br>3. Medical doctor<br>4. Masters<br>5. Specialized<br>6. Sub specialized                 |
| 108                                                           | Staff category                                                           | 1. Teaching staff<br>2. Hospital staff                                                                                      |
| 109                                                           | How long have you worked as a health professional?                       | _____ years                                                                                                                 |
| 110                                                           | Have you ever been diagnosed for TB?                                     | 1. Yes<br>2. No                                                                                                             |
| 111                                                           | Have you been trained for TB or MDR-TB within the last 12 months         | 1. Yes<br>2. No                                                                                                             |
| 112                                                           | Have you been trained for infection prevention within the last 12 months | 1. Yes<br>2. No                                                                                                             |

| <b>II. Questions about knowledge of MDR-TB</b> |                                                                                  |                                                                                                                                                                                                                                                                                                                                    |
|------------------------------------------------|----------------------------------------------------------------------------------|------------------------------------------------------------------------------------------------------------------------------------------------------------------------------------------------------------------------------------------------------------------------------------------------------------------------------------|
| 201                                            | What is multidrug-resistant tuberculosis or MDR-TB?                              | <ol style="list-style-type: none"> <li><b>1. TB that is resistant to isoniazid and rifampicin</b></li> <li>2. TB that is resistant to isoniazid and ethambutol</li> <li>3. TB that is resistant to rifampicin, ethambutol and pyrazinamide</li> <li>4. TB that is resistant to streptomycin and pyrazinamide</li> </ol>            |
| 202                                            | How does MDR-TB transmit?                                                        | <ol style="list-style-type: none"> <li>1. Sexually</li> <li><b>2. By droplet spread</b></li> <li>3. By direct contact</li> <li>4. By sharing needles</li> </ol>                                                                                                                                                                    |
| 203                                            | How does MDR-TB occur?                                                           | <ol style="list-style-type: none"> <li>1. When a person exposed to other TB patients</li> <li>2. When a person co-infected with HIV</li> <li><b>3. When TB treatments are not properly administered</b></li> <li>4. When a person had not been infected with TB previously</li> </ol>                                              |
| 204                                            | All people with MDR-TB infection show symptoms                                   | <ol style="list-style-type: none"> <li>1. True</li> <li><b>2. False</b></li> </ol>                                                                                                                                                                                                                                                 |
| 205                                            | What is the most common symptom of pulmonary MDR-TB?                             | <ol style="list-style-type: none"> <li><b>1. A cough or chest pain</b></li> <li>2. Abdominal pain</li> <li>3. Diarrhoea</li> <li>4. Loss of appetite</li> <li>5. High-grade fever</li> </ol>                                                                                                                                       |
| 206                                            | What is the best diagnostic methods for MDR-TB?                                  | <ol style="list-style-type: none"> <li>1. Culture examination</li> <li>2. Sputum smear examination</li> <li><b>3. Culture with drug susceptibility test (DST)</b></li> <li>4. Chest x-ray</li> </ol>                                                                                                                               |
| 207                                            | What is the major element to assess MDR-TB treatment cure?                       | <ol style="list-style-type: none"> <li><b>1. Culture conversion</b></li> <li>2. Chest x-ray</li> <li>3. Skin test</li> <li>4. All of the above</li> </ol>                                                                                                                                                                          |
| 208                                            | How long MDR-TB treatment takes?                                                 | <ol style="list-style-type: none"> <li>1. 4 months</li> <li>2. 6 months</li> <li>3. 9 months</li> <li><b>4. 18 months and above</b></li> <li>5. Don't know</li> </ol>                                                                                                                                                              |
| 209                                            | Which one of the following is the nationally recommended MDR-TB regimen regimen? | <ol style="list-style-type: none"> <li><b>1. Pyrazinamide, Kanamycin, Levofloxacin, Prothionamide, Cycloserine, Ethambutol</b></li> <li>2. Rifampicin, Kanamycin and Levofloxacin</li> <li>3. Kanamycin, Prothionamide, Cycloserine, Rifampicin, Pyrazinamide, Kanamycin, Levofloxacin, Prothionamide, Cycloserine, INH</li> </ol> |
| 210                                            | Putting on N95 can reduce the risk of transmission of MDR-TB?                    | <ol style="list-style-type: none"> <li><b>1. True</b></li> <li>2. False</li> </ol>                                                                                                                                                                                                                                                 |

| <b>II. Questions about MDR-TB prevention and control practices</b> |                                                                                        |                                                                                                    |
|--------------------------------------------------------------------|----------------------------------------------------------------------------------------|----------------------------------------------------------------------------------------------------|
| 401                                                                | Do you have an access to the MDR-TB guidelines                                         | 1. Yes<br>2. No                                                                                    |
| 402                                                                | Do you refer to the MDR-TB guidelines when caring for TB or MDR-TB suspected patients? | 1. Yes<br>2. No                                                                                    |
| 403                                                                | Is cross ventilation implemented in the wards at this hospital?                        | 1. Yes<br>2. No                                                                                    |
| 404                                                                | Do you open the windows when caring for the patient?                                   | 1. Yes<br>2. No                                                                                    |
| 405                                                                | Do you collect a sputum specimen for the patient in the ward?                          | 1. Yes<br>2. No                                                                                    |
| 406                                                                | Have you ever participated in educating patients about MDR-TB prevention?              | 1. Yes<br>2. No                                                                                    |
| 407                                                                | Does this hospital provide you with masks N95?                                         | 1. Yes<br>2. No                                                                                    |
| 408                                                                | How often do you use them (N95)?                                                       | 1. Always when attending MDR-TB or TB suspected patients<br>2. Frequently<br>3. Rarely<br>4. Never |



## STROBE Statement—checklist of items that should be included in reports of observational studies

|                              | Item No | Recommendation                                                                                                                                                                                                                                                                                                                                                                                                                                                         | Page  |
|------------------------------|---------|------------------------------------------------------------------------------------------------------------------------------------------------------------------------------------------------------------------------------------------------------------------------------------------------------------------------------------------------------------------------------------------------------------------------------------------------------------------------|-------|
| Title and abstract           | 1       | (a) Indicate the study's design with a commonly used term in the title or the abstract                                                                                                                                                                                                                                                                                                                                                                                 | 1&2   |
|                              |         | (b) Provide in the abstract an informative and balanced summary of what was done and what was found                                                                                                                                                                                                                                                                                                                                                                    | 2     |
| <b>Introduction</b>          |         |                                                                                                                                                                                                                                                                                                                                                                                                                                                                        |       |
| Background/rationale         | 2       | Explain the scientific background and rationale for the investigation being reported                                                                                                                                                                                                                                                                                                                                                                                   | 4     |
| Objectives                   | 3       | State specific objectives, including any prespecified hypotheses                                                                                                                                                                                                                                                                                                                                                                                                       | 4     |
| <b>Methods</b>               |         |                                                                                                                                                                                                                                                                                                                                                                                                                                                                        |       |
| Study design                 | 4       | Present key elements of study design early in the paper                                                                                                                                                                                                                                                                                                                                                                                                                | 5     |
| Setting                      | 5       | Describe the setting, locations, and relevant dates, including periods of recruitment, exposure, follow-up, and data collection                                                                                                                                                                                                                                                                                                                                        | 5     |
| Participants                 | 6       | (a) <i>Cohort study</i> —Give the eligibility criteria, and the sources and methods of selection of participants. Describe methods of follow-up<br><i>Case-control study</i> —Give the eligibility criteria, and the sources and methods of case ascertainment and control selection. Give the rationale for the choice of cases and controls<br><i>Cross-sectional study</i> —Give the eligibility criteria, and the sources and methods of selection of participants | 5     |
|                              |         | (b) <i>Cohort study</i> —For matched studies, give matching criteria and number of exposed and unexposed<br><i>Case-control study</i> —For matched studies, give matching criteria and the number of controls per case                                                                                                                                                                                                                                                 | NA    |
| Variables                    | 7       | Clearly define all outcomes, exposures, predictors, potential confounders, and effect modifiers. Give diagnostic criteria, if applicable                                                                                                                                                                                                                                                                                                                               | 6     |
| Data sources/<br>measurement | 8*      | For each variable of interest, give sources of data and details of methods of assessment (measurement). Describe comparability of assessment methods if there is more than one group                                                                                                                                                                                                                                                                                   | 6     |
| Bias                         | 9       | Describe any efforts to address potential sources of bias                                                                                                                                                                                                                                                                                                                                                                                                              | 6     |
| Study size                   | 10      | Explain how the study size was arrived at                                                                                                                                                                                                                                                                                                                                                                                                                              | 6     |
| Quantitative variables       | 11      | Explain how quantitative variables were handled in the analyses. If applicable, describe which groupings were chosen and why                                                                                                                                                                                                                                                                                                                                           | 7     |
| Statistical methods          | 12      | (a) Describe all statistical methods, including those used to control for confounding                                                                                                                                                                                                                                                                                                                                                                                  | 7     |
|                              |         | (b) Describe any methods used to examine subgroups and interactions                                                                                                                                                                                                                                                                                                                                                                                                    | 7     |
|                              |         | (c) Explain how missing data were addressed                                                                                                                                                                                                                                                                                                                                                                                                                            | 7     |
|                              |         | (d) <i>Cohort study</i> —If applicable, explain how loss to follow-up was addressed<br><i>Case-control study</i> —If applicable, explain how matching of cases and controls was addressed<br><i>Cross-sectional study</i> —If applicable, describe analytical methods taking account of sampling strategy                                                                                                                                                              | 6 & 7 |
|                              |         | (e) Describe any sensitivity analyses                                                                                                                                                                                                                                                                                                                                                                                                                                  | NA    |

Continued on next page

| <b>Results</b>           |     |                                                                                                                                                                                                              | <b>Pages</b> |
|--------------------------|-----|--------------------------------------------------------------------------------------------------------------------------------------------------------------------------------------------------------------|--------------|
| Participants             | 13* | (a) Report numbers of individuals at each stage of study—eg numbers potentially eligible, examined for eligibility, confirmed eligible, included in the study, completing follow-up, and analysed            | 7            |
|                          |     | (b) Give reasons for non-participation at each stage                                                                                                                                                         | 7            |
|                          |     | (c) Consider use of a flow diagram                                                                                                                                                                           | NA           |
| Descriptive data         | 14* | (a) Give characteristics of study participants (eg demographic, clinical, social) and information on exposures and potential confounders                                                                     | 7            |
|                          |     | (b) Indicate number of participants with missing data for each variable of interest                                                                                                                          | 7            |
|                          |     | (c) <i>Cohort study</i> —Summarise follow-up time (eg, average and total amount)                                                                                                                             | NA           |
| Outcome data             | 15* | <i>Cohort study</i> —Report numbers of outcome events or summary measures over time                                                                                                                          | NA           |
|                          |     | <i>Case-control study</i> —Report numbers in each exposure category, or summary measures of exposure                                                                                                         | NA           |
|                          |     | <i>Cross-sectional study</i> —Report numbers of outcome events or summary measures                                                                                                                           | 8 & 9        |
| Main results             | 16  | (a) Give unadjusted estimates and, if applicable, confounder-adjusted estimates and their precision (eg, 95% confidence interval). Make clear which confounders were adjusted for and why they were included | 8 & 9        |
|                          |     | (b) Report category boundaries when continuous variables were categorized                                                                                                                                    | 8 & 9        |
|                          |     | (c) If relevant, consider translating estimates of relative risk into absolute risk for a meaningful time period                                                                                             | NA           |
| Other analyses           | 17  | Report other analyses done—eg analyses of subgroups and interactions, and sensitivity analyses                                                                                                               | 8 & 9        |
| <b>Discussion</b>        |     |                                                                                                                                                                                                              |              |
| Key results              | 18  | Summarise key results with reference to study objectives                                                                                                                                                     | 9&10         |
| Limitations              | 19  | Discuss limitations of the study, taking into account sources of potential bias or imprecision. Discuss both direction and magnitude of any potential bias                                                   | 10           |
| Interpretation           | 20  | Give a cautious overall interpretation of results considering objectives, limitations, multiplicity of analyses, results from similar studies, and other relevant evidence                                   | 9&10         |
| Generalisability         | 21  | Discuss the generalisability (external validity) of the study results                                                                                                                                        | 11           |
| <b>Other information</b> |     |                                                                                                                                                                                                              |              |
| Funding                  | 22  | Give the source of funding and the role of the funders for the present study and, if applicable, for the original study on which the present article is based                                                | 11           |

\*Give information separately for cases and controls in case-control studies and, if applicable, for exposed and unexposed groups in cohort and cross-sectional studies.

**Note:** An Explanation and Elaboration article discusses each checklist item and gives methodological background and published examples of transparent reporting. The STROBE checklist is best used in conjunction with this article (freely available on the Web sites of PLoS Medicine at <http://www.plosmedicine.org/>, Annals of Internal Medicine at <http://www.annals.org/>, and Epidemiology at <http://www.epidem.com/>). Information on the STROBE Initiative is available at [www.strobe-statement.org](http://www.strobe-statement.org).
